# Supplementary material
Source: Springer Nature journal article supplement (https://www.springermedizin.de/resource/supplementary/12885_2009_1774_MOESM1_ESM.pdf/9472902)

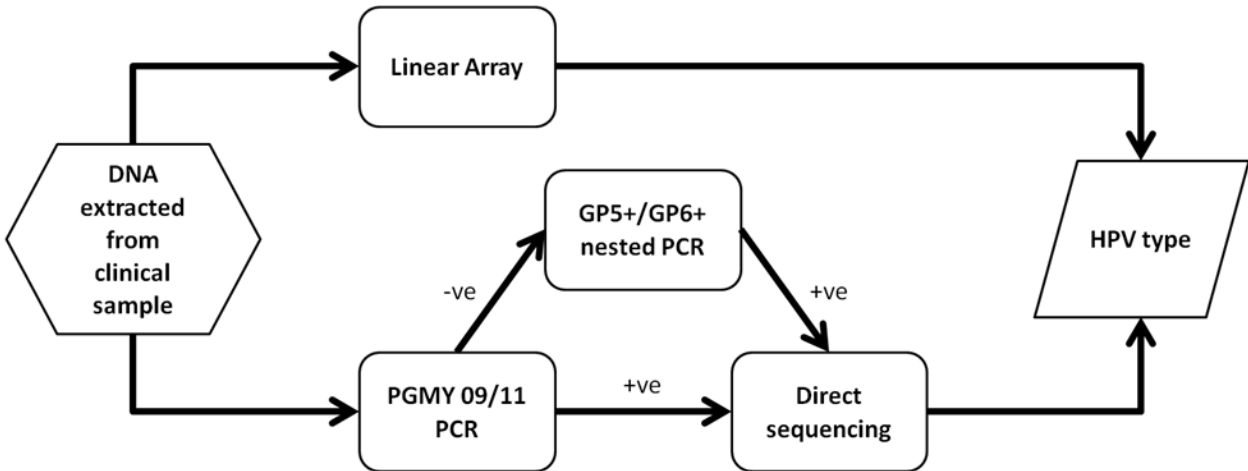

Supplement: MOESM1 [file 9472902]
